# Supplementary material for: Applications of the indole-alkaloid gramine modulate the assembly of individual members of the barley rhizosphere microbiota
Source: PeerJ journal article supplement (doi:10.7717/peerj.12498), 2021-11-22

# Non-linearized isotherm adsorption models – Gramine in Quarryfield soil

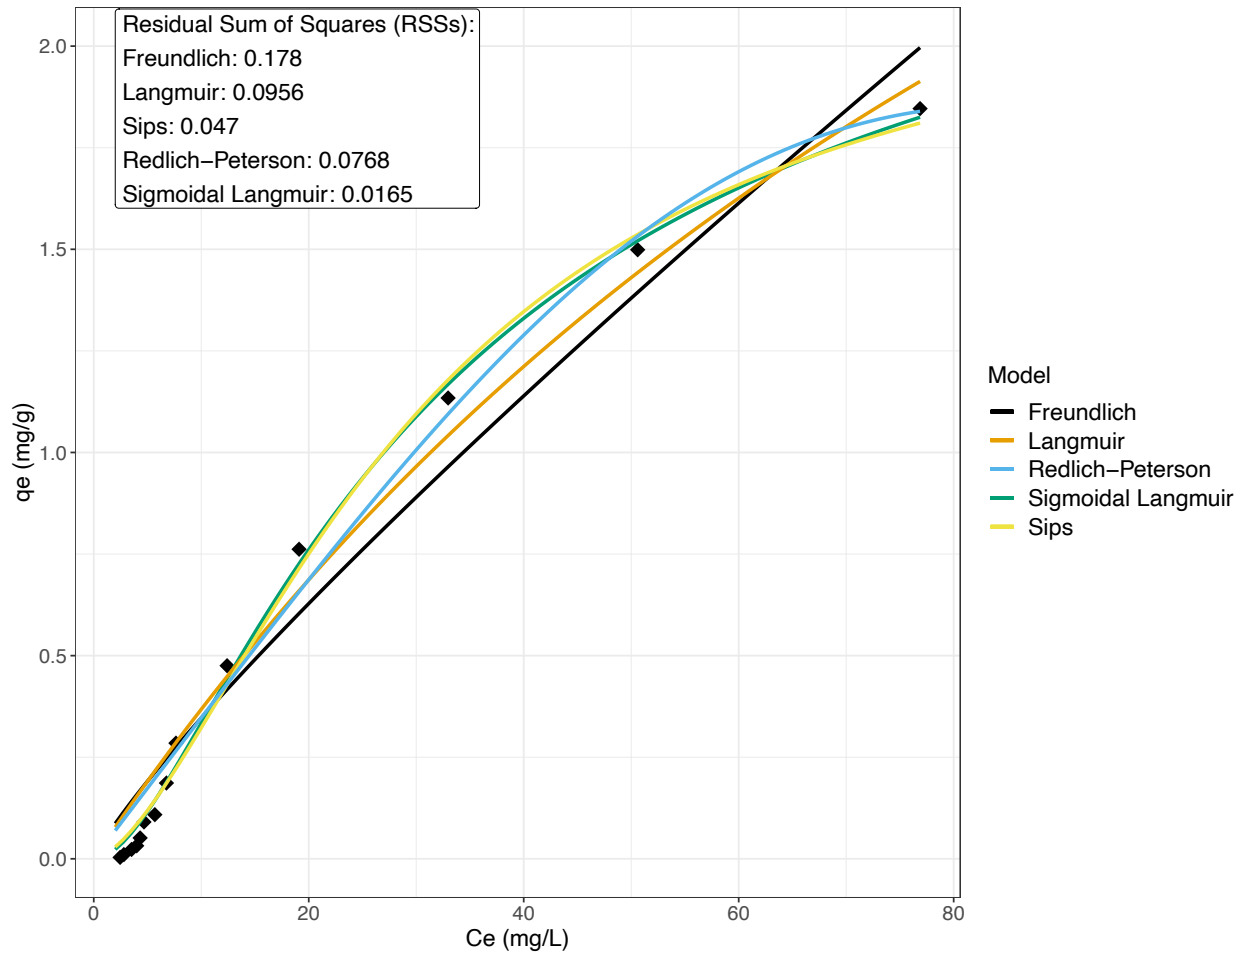

Supplement: biorxiv414870-file001-sup.pdf [file biorxiv414870-file001-sup.pdf]
